# Supplementary material for: Spatio-Temporal Gait Parameters of Hospitalized Older Patients: Comparison of Fallers and Non-Fallers
Source: MDPI journal article supplement (doi:10.3390/ijerph20054563), 2023-03-04
Supplement: s1 [file s1]

**Supplementary Material Table S1:** Normative Data (Mean±SD) for Parameters Constituting Rhythm, Phases, Variability, Pace and Base of Support Domains of Gait Performance by Gender and Age [13]

| Parameter                       | Men (n=108) |          |          |           | Women (n=186) |          |          |          |
|---------------------------------|-------------|----------|----------|-----------|---------------|----------|----------|----------|
|                                 | 70-74       | 75-79    | 80-84    | 85+       | 70-74         | 75-79    | 80-84    | 85+      |
|                                 | n=27        | n=30     | n=37     | n=14      | n=33          | n=77     | n=43     | n= 33    |
| <b>Cadence (steps/min)</b>      | 102±8       | 106±10   | 103±8    | 102±11    | 113±20        | 114±13   | 110±9    | 108±10   |
| <b>Step Time (s)</b>            | 0.59±.05    | 0.56±.05 | 0.59±.04 | 0.59±.08  | 0.53±.06      | 0.53±.06 | 0.55±.05 | 0.56±.05 |
| <b>Swing (% cycle)</b>          | 36.6± 1.5   | 36.7±1.5 | 36.6±2.8 | 35.1±2.69 | 36.6±2.6      | 36.1±3.0 | 35.5±2.5 | 35.7±2.6 |
| <b>Stance (% cycle)</b>         | 63.2±2.1    | 64.0±2.5 | 63.8±2.7 | 64.9±2.7  | 63.3±3.1      | 63.9±3.0 | 64.5±2.6 | 64.5±2.5 |
| <b>Single Support (% cycle)</b> | 37.1±1.8    | 37.0±1.7 | 36.5±2.2 | 35.2±2.1  | 37.0±3.20     | 35.8±4.8 | 35.6±2.4 | 35.7±2.8 |
| <b>Double Support (% cycle)</b> | 26.3±3.0    | 26.5±2.3 | 27.4±4.7 | 30.3±3.5  | 27.14±4.0     | 28.4±6.4 | 29.0±4.6 | 28.7±4.8 |
| <b>Gait Speed (cm/s)</b>        | 117±16      | 122±15   | 112±17   | 101±22    | 116±20        | 112±17   | 101±15   | 98±20    |
| <b>Step Length (cm)</b>         | 69±8        | 68±7     | 65±8     | 59±10     | 61±9          | 59±7     | 55±7     | 54±9     |
| <b>Stride Length (cm)</b>       | 139±14      | 137±12   | 131±17   | 119±21    | 123±17        | 118±15   | 111±14   | 109±18   |
| <b>Base of Support (cm)</b>     | 9.7±3.0     | 8.9±5.2  | 11.2±4.0 | 9.9±4.8   | 7.0±3.5       | 7.7±4.0  | 7.9±4.1  | 9.1±2.6  |
| <b>Variability</b>              |             |          |          |           |               |          |          |          |
| <b>Step Length (%CV)</b>        | 4.6±6.7     | 5.4±2.7  | 5.1±2.8  | 5.8±3.4   | 7.7±11.6      | 5.7±7.2  | 5.9±2.7  | 6.2±2.4  |
| <b>Step Time (%CV)</b>          | 5.2±6.9     | 4.1±2.9  | 4.7±2.0  | 5.0±1.7   | 7.1±8.6       | 5.9±6.4  | 5.5±2.6  | 5.5±2.6  |
| <b>Stride Length (%CV)</b>      | 2.9±1.1     | 4.2±4.6  | 3.8±2.0  | 5.7±3.2   | 4.1±4.7       | 4.7±5.6  | 4.3±2.1  | 5.2±5.2  |
| <b>Swing Time (%CV)</b>         | 4.5±2.2     | 4.5±7.8  | 5.1±2.2  | 8.6±11.4  | 6.2±10.5      | 8.5±9.5  | 6.2±2.2  | 8.0±9.7  |
| <b>Stance Time (%CV)</b>        | 4.9±4.6     | 5.9±7.0  | 4.7±3.0  | 5.3±2.9   | 5.7±4.4       | 5.3±5.1  | 5.3±2.9  | 5.6±4.1  |
| <b>Stride Speed (%CV)</b>       | 5.0±2.9     | 5.5±4.4  | 5.5±3.2  | 7.3±3.8   | 5.6±3.4       | 5.5±2.7  | 6.8±3.2  | 6.9±3.3  |
